# Supplementary material for: Directing the selectivity of CO2 electroreduction to target C2 products via non-metal doping on Cu surfaces
Source: Royal Society of Chemistry journal article supplement (doi:10.1039/d0ta11604a), 2021-01-01
Supplement: d0ta11604a1.pdf [file d0ta11604a1.pdf]

Supporting Information

## **Directing Selectivity of CO<sub>2</sub> Electroreduction to Target C<sub>2</sub> products via Non-metal Doping on Cu Surfaces**

Xing Zhi, Yan Jiao\*, Yao Zheng, Kenneth Davey, Shi-Zhang Qiao\*

Centre for Materials in Energy and Catalysis (CMEC)

School of Chemical Engineering and Advanced Materials

The University of Adelaide, SA 5005, Australia

\*Email: [yan.jiao@adelaide.edu.au](mailto:yan.jiao@adelaide.edu.au); [s.qiao@adelaide.edu.au](mailto:s.qiao@adelaide.edu.au)

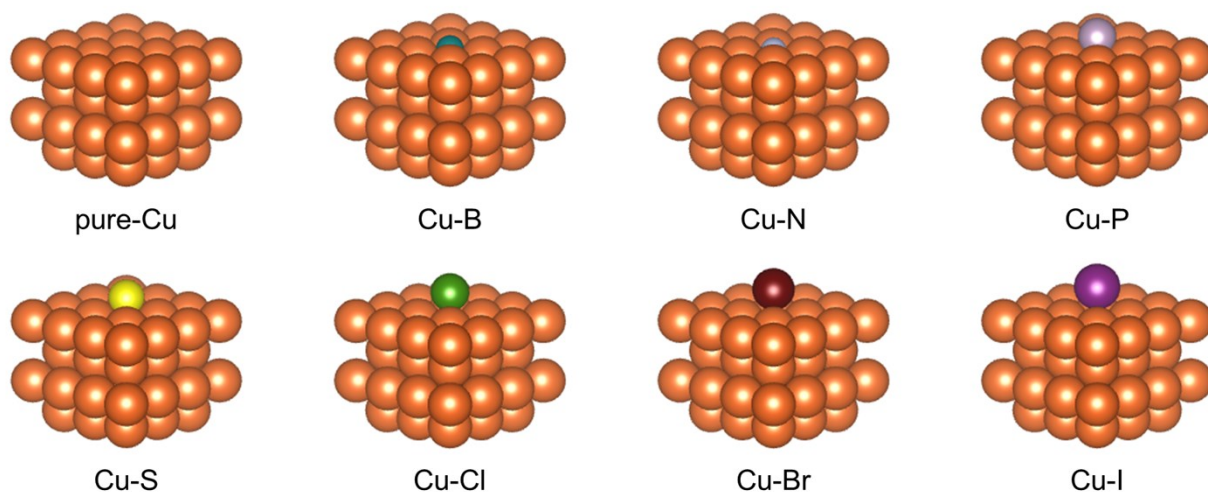

**Figure S1.** Optimized configurations of Cu-X, and pure Cu, surfaces. Copper atoms are shown as orange-spheres with other non-metal atoms labelled for each structure. Fluorine is not included as a doping element, because after geometry optimization of some reaction intermediates on the Cu-F model, the F atom move away from its original position, which indicates geometric instability of Cu-F model.

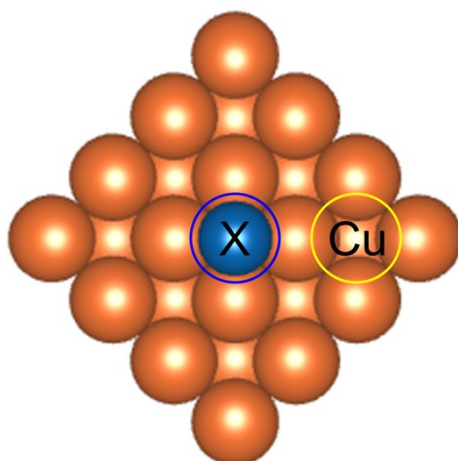

**Figure S2.** Dopant atom site (blue circle) and Cu site (yellow circle) used to rationalize oxygen affinities as descriptors for  $C_2$  product selectivity on Cu-X catalysts.

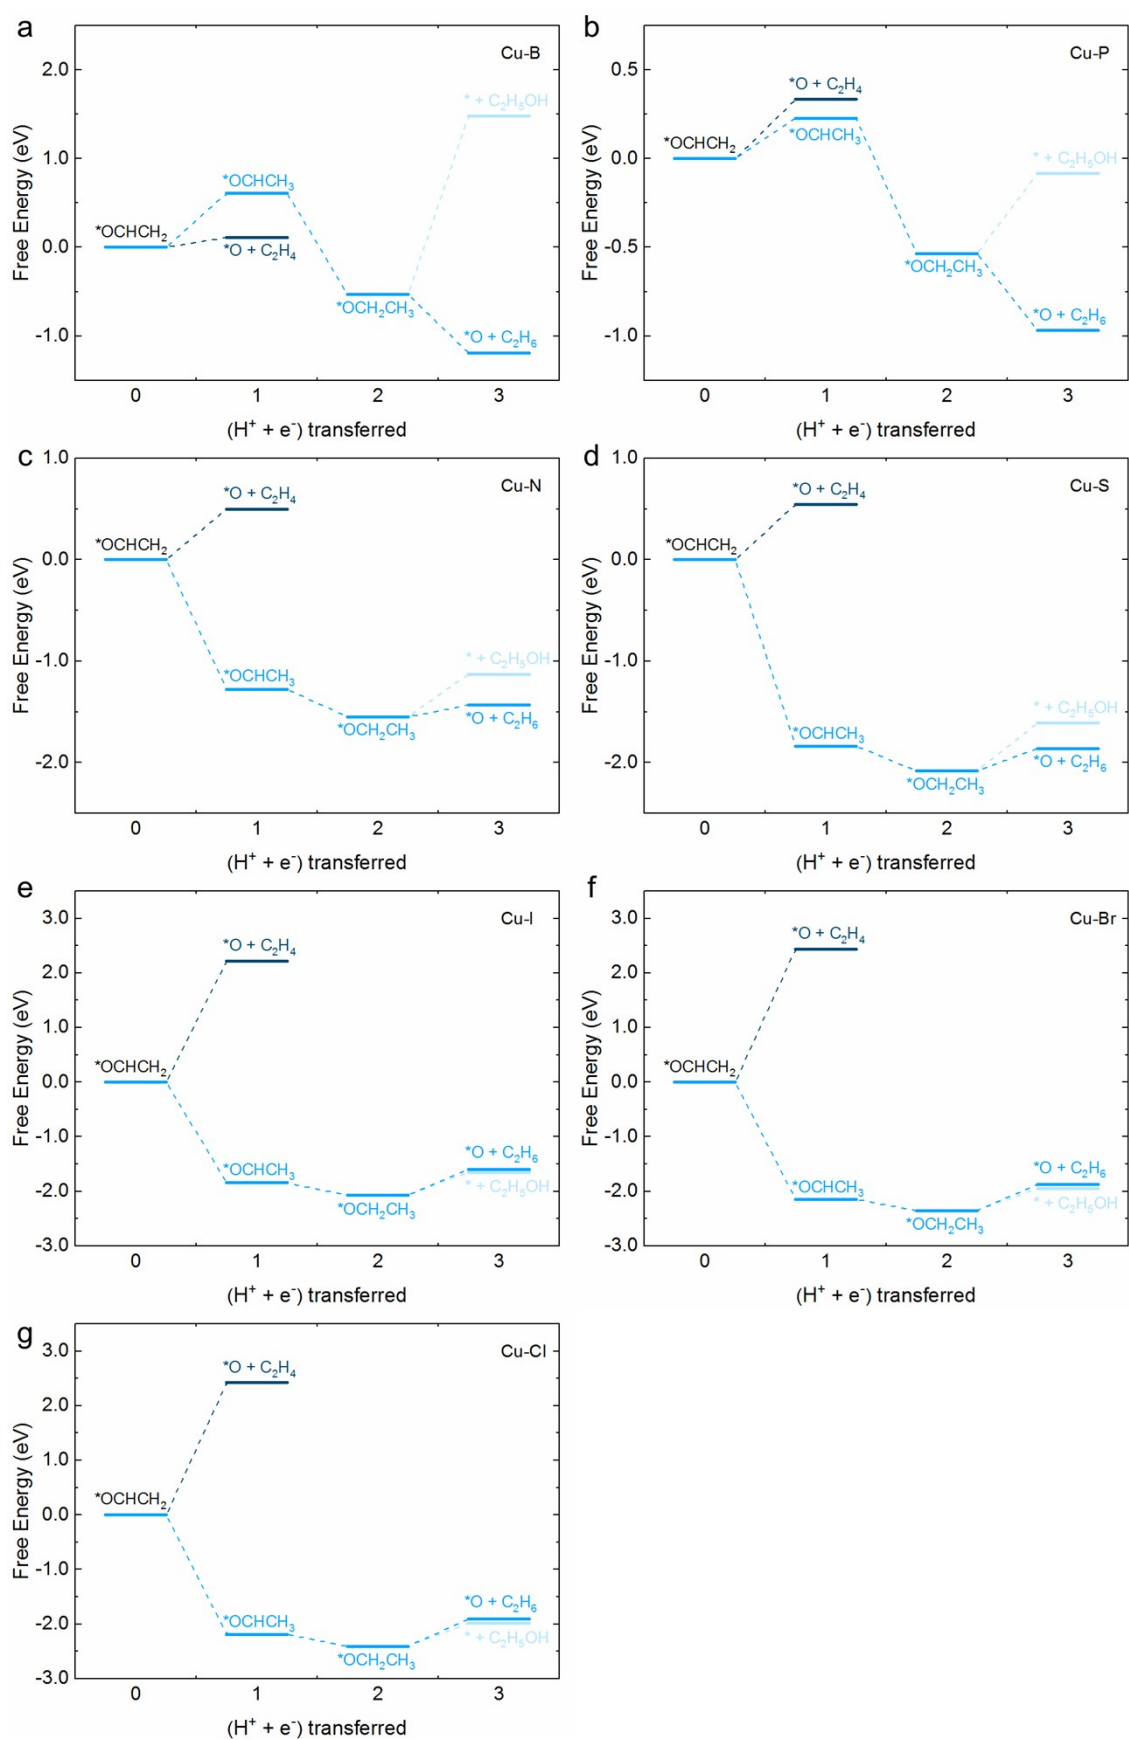

**Figure S3.** Free energy diagram starting from  $*\text{OCHCH}_2$  intermediate adsorbed on the dopant atom site to ethylene (dark blue line), ethane (blue line) and ethanol (light blue line) for each Cu-X surface.

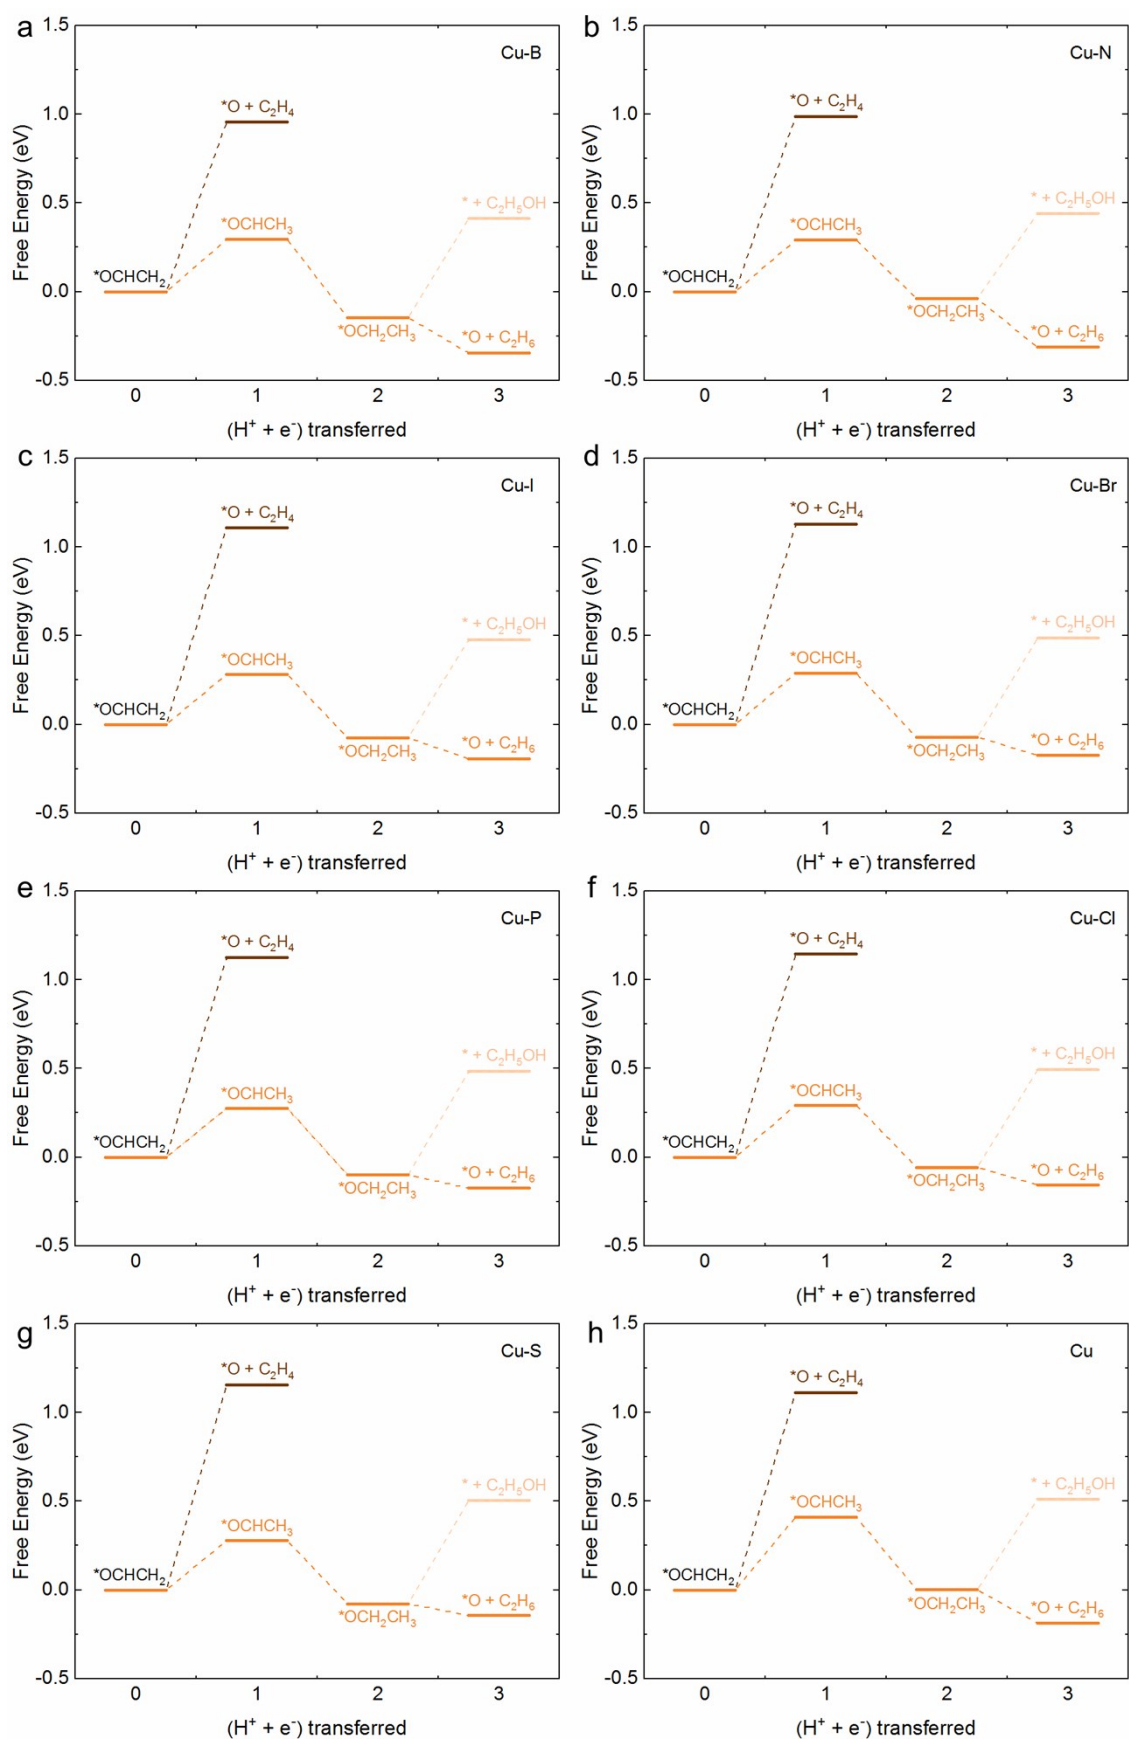

**Figure S4.** Free energy diagram starting from  $*\text{OCHCH}_2$  intermediate adsorbed on the Cu site to ethylene (orange-brown line), ethane (orange line) and ethanol (light orange line) for each Cu-X surface and pure Cu surface.

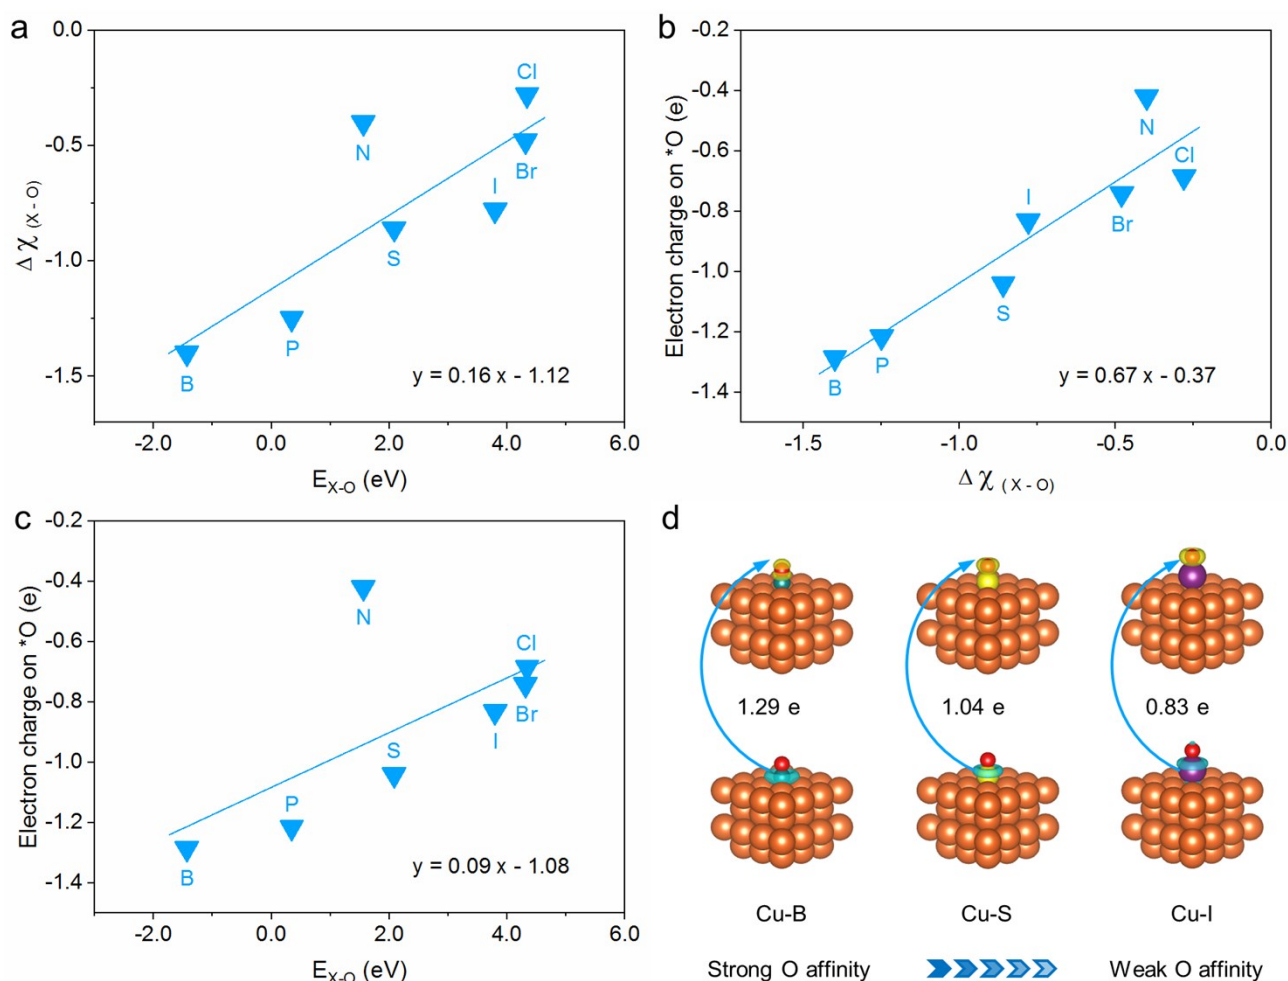

**Figure S5.** (a) Electronegativity difference between doping element and oxygen plotted against O affinity of the dopant atom site ( $E_{X-O}$ ). (b) Electron charge on  $^*O$  adsorbed on the dopant atom site plotted against the electronegativity difference between the doping element and oxygen. (c) Relationship between the electron charge on  $^*O$  adsorbed on the dopant atom site and O affinity of the dopant atom site ( $E_{X-O}$ ). (d) Electron charge transfer of  $^*O$  adsorbed on the dopant atom site of Cu-B (left), Cu-S (middle), and Cu-I (right) with decreasing  $E_{X-O}$ . Yellow and cyan isosurface represents electron accumulation and electron depletion, respectively. The isosurface value is  $2 \times 10^{-2} e \text{ \AA}^{-3}$ .

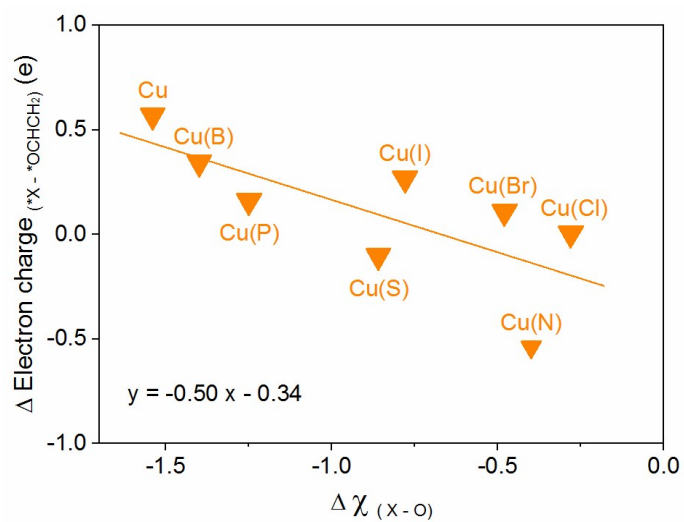

**Figure S6.** Difference in electron charge between dopant atom and  $^*OCHCH_2$  adsorbed on the Cu site plotted against electronegativity difference between doping element and oxygen.

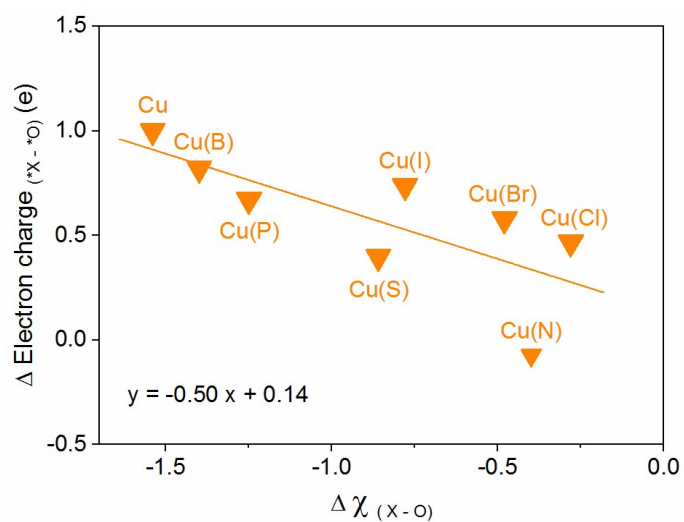

**Figure S7.** Difference in electron charge between dopant atom and  $^*O$  adsorbed on the Cu site plotted against electronegativity difference between doping element and oxygen.

**Table S1.** Adhesion energy (in eV) of dopant atom X on a hollow site of Cu(100) surface.

| Model catalyst | $E_{\text{ah}}^a$ | $E_{\text{X}}^b$ |
|----------------|-------------------|------------------|
| Cu-B           | 0.715             | -6.704           |
| Cu-P           | -1.288            | -5.372           |
| Cu-N           | 0.524             | -8.312           |
| Cu-S           | -2.071            | -4.126           |
| Cu-I           | -2.195            | -1.316           |
| Cu-Br          | -2.168            | -1.490           |
| Cu-Cl          | -2.194            | -1.777           |

<sup>a</sup> $E_{\text{ah}}$  values were computed as  $E_{\text{ah}} = E_{\text{Cu-X}} - E_{\text{Cu}} - E_{\text{X}}$ , where  $E_{\text{Cu-X}}$  is the energy of Cu-X surface,  $E_{\text{Cu}}$  is the energy of Cu(100) surface, and <sup>b</sup> $E_{\text{X}}$  is the energy of X atom in its most stable format. For N, Cl, Br and I doped catalysts, the reference energies for  $E_{\text{X}}$  are based on calculated energies of  $\text{N}_2$ ,  $\text{Cl}_2$ ,  $\text{Br}_2$  and  $\text{I}_2$  gaseous molecules, respectively. For B, P and S doped catalysts, the reference energies for  $E_{\text{X}}$  are based on calculated energies of corresponding elementary substances, which are  $\text{B}_{12}$ ,  $\text{P}_4$ , and  $\text{S}_{32}$ .

**Table S2.** Adhesion energy (in eV) of dopant atom X on a bridge site or a top site of Cu(100) surface.

| Model catalyst | $E_{\text{ah}}^a$<br>(bridge site) | $E_{\text{ah}}^a$<br>(top site) |
|----------------|------------------------------------|---------------------------------|
| Cu-B           | 2.317                              | 3.168                           |
| Cu-P           | -0.136                             | 0.580                           |
| Cu-N           | 2.037                              | 3.376                           |
| Cu-S           | -1.146                             | -0.358                          |
| Cu-I           | -1.940                             | -1.653                          |
| Cu-Br          | -1.991                             | -1.682                          |
| Cu-Cl          | -2.079                             | -1.743                          |

<sup>a</sup> $E_{\text{ah}}$  values were computed as  $E_{\text{ah}} = E_{\text{Cu-X}} - E_{\text{Cu}} - E_{\text{X}}$ , where  $E_{\text{Cu-X}}$  is the energy of Cu-X surface,  $E_{\text{Cu}}$  is the energy of Cu(100) surface, and  $E_{\text{X}}$  is the energy of X atom.  $E_{\text{X}}$  values are the same as those listed in Table S1.



**Table S3.** Comparative summary of optimized configurations of key, C<sub>2</sub> reaction intermediates in this research, beginning with \*OCHCH<sub>2</sub> adsorbed on the dopant atom site.

| Model catalyst | *OCHCH <sub>2</sub> | *O <sup>a</sup> | *OCHCH <sub>3</sub> | *OCH <sub>2</sub> CH <sub>3</sub> | *O <sup>b</sup> |
|----------------|---------------------|-----------------|---------------------|-----------------------------------|-----------------|
| Cu-B           |                     |                 |                     |                                   |                 |
| Cu-P           |                     |                 |                     |                                   |                 |
| Cu-N           |                     |                 |                     |                                   |                 |
| Cu-S           |                     |                 |                     |                                   |                 |
| Cu-I           |                     |                 |                     |                                   |                 |
| Cu-Br          |                     |                 |                     |                                   |                 |
| Cu-Cl          |                     |                 |                     |                                   |                 |

<sup>a</sup> Optimized \*O adsorption configurations after ethylene desorption from \*OCHCH<sub>2</sub>. <sup>b</sup> Optimized \*O adsorption configurations following ethane desorption from \*OCH<sub>2</sub>CH<sub>3</sub>.

**Table S4.** Comparative summary of optimized configurations of key, C<sub>2</sub> reaction intermediates in this research, beginning with \*OCHCH<sub>2</sub> adsorbed on the Cu site.

| Model catalyst | *OCHCH <sub>2</sub>                                                                 | *O <sup>a</sup>                                                                     | *OCHCH <sub>3</sub>                                                                 | *OCH <sub>2</sub> CH <sub>3</sub>                                                     | *O <sup>b</sup>                                                                       |
|----------------|-------------------------------------------------------------------------------------|-------------------------------------------------------------------------------------|-------------------------------------------------------------------------------------|---------------------------------------------------------------------------------------|---------------------------------------------------------------------------------------|
| Cu-B           | 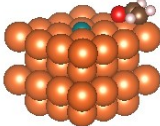   |    |    |    |    |
| Cu-N           |    |    |    |    |    |
| Cu-I           |    |    |    |    |    |
| Cu-Br          |   |   |   |   |   |
| Cu-P           |  |  |  |  |  |
| Cu-Cl          |  |  |  |  |  |
| Cu-S           |  |  |  |  |  |
| Cu             |  |  |  |  |  |

<sup>a</sup> Optimized \*O adsorption configurations after ethylene desorption from \*OCHCH<sub>2</sub>. <sup>b</sup> Optimized \*O adsorption configurations after ethane desorption from \*OCH<sub>2</sub>CH<sub>3</sub>.

**Table S5.** Thermodynamic energy corrections (in eV) for reaction intermediates.

| Adsorbate                         | ZPE   | -TS    |
|-----------------------------------|-------|--------|
| *OCHCH <sub>2</sub>               | 1.200 | -0.274 |
| *OCHCH <sub>3</sub>               | 1.498 | -0.310 |
| *OCH <sub>2</sub> CH <sub>3</sub> | 1.837 | -0.281 |

**Table S6.** Thermodynamic energy corrections (in eV) for gaseous molecules.

| Gas molecule                     | ZPE   | -TS    |
|----------------------------------|-------|--------|
| CO <sub>2</sub>                  | 0.307 | -0.661 |
| C <sub>2</sub> H <sub>4</sub>    | 1.356 | -0.411 |
| C <sub>2</sub> H <sub>6</sub>    | 1.805 | -0.519 |
| C <sub>2</sub> H <sub>5</sub> OH | 2.119 | -0.572 |

**Table S7.** Solvation corrections (in eV) for reaction intermediates.

| Adsorbate                         | Solvation Correction |
|-----------------------------------|----------------------|
| *OCHCH <sub>2</sub>               | 0.38                 |
| *OCHCH <sub>3</sub>               | 0.10                 |
| *OCH <sub>2</sub> CH <sub>3</sub> | 0.00                 |

**Table S8.** Free energy change (in eV) of \*H adsorption on the dopant atom site of Cu-X surface.

| Model catalyst | $\Delta G_{*H}$    |
|----------------|--------------------|
| Cu-B           | -0.473             |
| Cu-P           | 0.036              |
| Cu-N           | -0.935             |
| Cu-S           | 0.710              |
| Cu-I           | 1.932 <sup>a</sup> |
| Cu-Br          | 1.914 <sup>a</sup> |
| Cu-Cl          | 1.874 <sup>a</sup> |

<sup>a</sup> Free energy change of \*H adsorption on the dopant atom site of Cu-I, Cu-Br, and Cu-Cl was calculated with the dopant atom fixed in z direction.

For Cu-X catalysts with positive free energy change of \*H adsorption on the dopant atom site, the hydrogen evolution reaction (HER) is not favorable. Regarding the Cu-X catalysts with negative free energy change of \*H adsorption, the HER may have an effect on the full product distribution. In experimental studies, the hydrogen evolution also exhibits an inevitable Faradaic efficiency during the electrocatalytic CO<sub>2</sub> reduction [Nat. Chem., 2018, 10, 974-980]. However, for most Cu-X catalysts in this study, the HER is thermodynamically unfavorable.

**Table S9.** Free energy differences (in eV) between two states of acetaldehyde, i.e. adsorbed \*OCHCH<sub>3</sub> and CH<sub>3</sub>CHO molecule, with dopant atoms and Cu examined as active sites.

| Model catalyst | $\Delta G_{-X}^a$ | $\Delta G_{-Cu}^b$ |
|----------------|-------------------|--------------------|
| Cu-B           | -1.261            | -0.509             |
| Cu-P           | -0.080            | -0.599             |
| Cu-N           | -0.540            | -0.541             |
| Cu-S           | -0.622            | -0.617             |
| Cu-I           | -0.585            | -0.587             |
| Cu-Br          | -0.592            | -0.589             |
| Cu-Cl          | -0.592            | -0.590             |
| Cu             | <sup>c</sup>      | -0.492             |

<sup>a</sup>  $\Delta G_{-X}$  is the free energy difference between adsorbed \*OCHCH<sub>3</sub> on the dopant atom site and CH<sub>3</sub>CHO molecule with catalyst substrate. <sup>b</sup>  $\Delta G_{-Cu}$  is the free energy difference between adsorbed \*OCHCH<sub>3</sub> on the Cu site and CH<sub>3</sub>CHO molecule with catalyst substrate. <sup>c</sup>  $\Delta G_{-X}$  value for pure Cu model catalyst is missing due to the absence of dopant atom site. The negative values of  $\Delta G$  indicate favorable thermodynamics for \*OCHCH<sub>3</sub> formation.

**Table S10.** Adsorption energy (in eV) of \*OH intermediate on Cu-X and Cu surfaces

| Model catalyst | $E_{*OH}^a$ |
|----------------|-------------|
| Cu-B           | -1.317      |
| Cu-P           | -0.180      |
| Cu-N           | -0.159      |
| Cu-S           | -0.196      |
| Cu-I           | -0.171      |
| Cu-Br          | -0.177      |
| Cu-Cl          | -0.180      |
| Cu             | -0.194      |

<sup>a</sup>  $E_{*OH}$  values were obtained by optimizing the \*OH adsorption on various active sites of Cu-X and Cu surfaces. The Cu-X catalysts that have very high O affinity to the dopant atom (e.g. Cu-B) exhibit limited efficiency for \*OH removal. Along with decreasing O affinity to the dopant atom, the removal of \*OH from Cu-X catalysts surfaces is likely to be facilitated.

**Table S11.** Electronegativity ( $\chi$ ) of doping element, copper and oxygen.

| Atomic symbol | $\chi$ |
|---------------|--------|
| B             | 2.04   |
| P             | 2.19   |
| N             | 3.04   |
| S             | 2.58   |
| I             | 2.66   |
| Br            | 2.96   |
| Cl            | 3.16   |
| Cu            | 1.90   |
| O             | 3.44   |
